## Growth dynamics and osteoarthritis

1 **Running head:** Growth dynamics and osteoarthritis

2 **Characterisation of growth plate dynamics in murine models of osteoarthritis**

3 Hasmik J. Samvelyan<sup>1,2</sup>, Kamel Madi<sup>3</sup>, Anna E. Törnqvist<sup>4,5</sup>, Behzad Javaheri<sup>6</sup>, Katherine A.

4 Staines<sup>1,2</sup>

5 <sup>1</sup> School of Pharmacy and Biomolecular Studies, University of Brighton, Brighton, UK

6 <sup>2</sup> Centre for Stress and Age-Related Disease, University of Brighton, Brighton, UK

7 <sup>3</sup> 3Dmagination Ltd, Harwell Campus, Didcot, UK

8 <sup>4</sup> Rheumatology and Bone Diseases Unit, Centre for Genomic and Experimental Medicine,  
9 MRC Institute of Genetics and Molecular Medicine, University of Edinburgh, Edinburgh, UK

10 <sup>5</sup> Centre for Bone and Arthritis Research, University of Gothenburg, Gothenburg, Sweden

11 <sup>6</sup> School of Mathematics, Computer Science and Engineering, City University of London,  
12 London, UK

13

14 Corresponding authors

15 Katherine Ann Staines, University of Brighton, Lewes Road, Brighton BN2 4GJ

16 Email: [k.staines@brighton.ac.uk](mailto:k.staines@brighton.ac.uk) Tel: 01273 642 094

17 Hasmik Jasmine Samvelyan, University of Brighton, Lewes Road, Brighton BN2 4GJ

18 Email: [h.samvelyan@brighton.ac.uk](mailto:h.samvelyan@brighton.ac.uk) Tel: 01273 641 671

19 **Funding**

20 We are grateful to Medical Research Council (to KAS; MR/R022240/1), Tenovus Scotland,  
21 the Swedish Research Council (to AET; 2013–455) for funding.

22 **Conflict of interest**

23 The research leading to these results has received technical support from 3Dmagination Ltd,  
24 Didcot, UK. KM is co-founder and director of 3Dmagination Ltd in Oxford, UK, a company  
25 which provides training and consultancy in 3D and 4D imaging. The funding sources did not  
26 influence on the study design, data collection, analyses, interpretation, writing or submission  
27 of the manuscript.

## Growth dynamics and osteoarthritis

### 28 **Abstract**

29 *Objective:* To investigate growth plate (GP) dynamics in surgical and loading murine models  
30 of osteoarthritis (OA), to understand whether abnormalities in these dynamics predict those at  
31 risk of OA.

32 *Methods:* 8-week-old C57BL/6 male mice underwent destabilization of medial meniscus  
33 (DMM) ( $n=8$ ) surgery in right knee joints. Contralateral left knee joints had no intervention  
34 (controls). In 16-week-old C57BL/6 male mice ( $n=4$ ), OA was induced using non-invasive  
35 mechanical loading of right knee joints with peak force of 11N. Non-loaded left knee joints  
36 were internal controls. Chondrocyte transiency in tibial articular cartilage (AC) and GP was  
37 examined by histology and immunohistochemistry. Tibial subchondral bone (SCB)  
38 parameters were measured using microCT and correlated to GP bridging.

39 *Results:* Higher expression of chondrocyte hypertrophy markers; Col10a1 and MMP13 were  
40 observed in tibial AC chondrocytes of DMM and loaded mice. In tibial GP, Col10a1 and  
41 MMP13 expressions were widely dispersed in a significantly enlarged zone of proliferative  
42 and hypertrophic chondrocytes ( $P>0.001$ ). 3-dimensional quantification revealed enriched GP  
43 bridging and higher bridge densities in medial compared to lateral tibiae of DMM and loaded  
44 knee joints of the mice. GP dynamics were associated with increased SCB and epiphyseal  
45 trabecular bone volume fraction (BV/TV; %) in medial tibiae of DMM and loaded knee joints  
46 respectively.

47 *Conclusions:* Results confirm associations between aberrant chondrocyte hypertrophy marker  
48 expression and OA pathology in a surgical and loaded murine model of OA. Spatial  
49 variations in GP bridging formation revealed accelerated cartilage-bone transitions which  
50 may contribute to anatomical variation in vulnerability to OA development in these models.

51

## Growth dynamics and osteoarthritis

### 52 **Introduction**

53 Osteoarthritis (OA) is a chronic musculoskeletal disease and a leading cause of disability and  
54 major healthcare costs in the world. It is estimated that worldwide 10% of men and 18% of  
55 women aged over 60 years have symptomatic OA (1) and, therefore, the predicted increase in  
56 the ageing population and longevity will result in a greater occurrence of the disease. OA is a  
57 complex disease in which the pathogenesis, cellular and molecular mechanisms of initiation  
58 and progression are not completely understood. It is characterised by progressive loss of  
59 articular cartilage (AC), formation of osteophytes, subchondral bone (SCB) sclerosis,  
60 synovial proliferation and inflammation and lax tendons. These can ultimately lead to a loss  
61 of joint function, pain, reduced mobility and disability (2). Despite the significant healthcare  
62 and economic burden there are few non-invasive therapies available to patients. Therefore,  
63 understanding the pathogenesis of OA and defining the molecular mechanisms underpinning  
64 AC degeneration can lead to the development of successful targeted and effective disease-  
65 modifying treatments.

66 Primary OA is described as naturally occurring OA affecting one joint (localised) or three or  
67 more joints (generalised), while secondary OA is associated with various causes and risk  
68 factors leading to the disease including trauma, obesity, diabetes, metabolic bone and  
69 congenital disorders (3). AC degeneration is one of the main hallmarks of OA and previous  
70 research has largely sought to identify mechanisms underpinning its deterioration. Fully  
71 developed, uncalcified AC is populated by a single resident cell chondrocytes, which  
72 maintain a stable phenotype characterised by small cell size and expression of tenascin-C (4).  
73 The inherent stability of AC chondrocytes ensures that dynamic events are restricted to assure  
74 lifelong articular integrity and healthy joint function. In contrast, epiphyseal growth plate  
75 (GP) chondrocytes have a transient phenotype to ensure long bone development  
76 (endochondral ossification) and growth. GP chondrocytes undergo a differentiation sequence

## Growth dynamics and osteoarthritis

77 of proliferation, maturation and hypertrophy. The final stage of chondrocyte hypertrophy  
78 enables mineralisation of the cartilage extracellular matrix, vascular invasion and subsequent  
79 replacement of the mineralised cartilage anlagen with bone (5). These processes are coupled,  
80 however, with sexual maturation the human GP undergoes progressive narrowing as bony  
81 bridges form and span its width. This ultimately leads to complete GP closure and cessation  
82 of human growth. Indeed, in humans the longitudinal bone growth stops with the onset of  
83 puberty, the metaphysis then fuses with the epiphysis and the growth plate disappears (6). In  
84 mice, longitudinal bone growth does not cease at sexual maturity instead it slows  
85 dramatically at puberty, but the growth plates do not completely fuse and disappear (7).

86 We have previously shown that in the STR/Ort mouse, a naturally occurring OA murine  
87 model, AC chondrocytes transform from their inherently stable phenotype to a transient one,  
88 characteristic of the chondrocytes in the GP. This was confirmed by immunolabelling for  
89 chondrocyte hypertrophy markers; type X collagen (Col10a1) and matrix metalloproteinase  
90 13 (MMP13) (8). Further, we revealed accelerated longitudinal bone growth, aberrant  
91 expression of growth plate markers (Col10a1 and MMP13) and increased growth plate  
92 chondrocyte maturation in these mice. Consistent with this, using a novel synchrotron  
93 computed tomography method we revealed enriched GP bone bridging in STR/Ort mouse  
94 tibiae indicative of advanced GP closure which may underpin OA (8,9).

95 Despite this, interlinks between the differing chondrocyte phenotypes in the AC and the GP,  
96 and the contribution that the GP may play in underpinning OA vulnerability is not yet  
97 understood. Indeed, understanding this will inform strategies for maintaining musculoskeletal  
98 health in ageing by potentially identifying whether GP dynamics may predict who is at risk of  
99 OA in later life and ultimately developing targeted OA treatments. Therefore, we  
100 hypothesised that surgically (destabilisation the medial meniscus [DMM]) or non-surgically

## Growth dynamics and osteoarthritis

101 (mechanical loading) induced OA onset in C57BL/6 mice is linked to altered growth plate  
102 dynamics.

### 103 **Materials and Methods**

#### 104 *Animals*

105 Male C57BL/6 wild type mice at 7 weeks of age (young adult) were obtained from Charles  
106 River Laboratories Inc. (Margate, UK). The mice were acclimatised to their surroundings for  
107 seven days. All mice were allowed free access to water and maintenance diet ad libitum  
108 (Special Diet Services, Witham, UK) in a 12-hour light/dark cycle at a room temperature of  
109  $21 \pm 2^{\circ}\text{C}$  and relative humidity of  $55 \pm 10\%$ . All procedures complied with the United  
110 Kingdom Animals (Scientific Procedures) Act 1986 and were approved by The University of  
111 Edinburgh Roslin Institute's Animal Users and Research Ethics Committees. All analyses  
112 were conducted blindly to minimise the effects of subjective bias.

#### 113 *The destabilisation of the medial meniscus (DMM)*

114 A group of eight 8-week old wild type C57/BL6 male mice underwent DMM surgeries to  
115 induce OA-like changes in the right knee joints under isoflurane-induced anaesthesia. We  
116 chose not to performed SHAM (placebo) surgery on the left contralateral knee of the animals  
117 based upon animal welfare grounds since it was previously shown that there is no difference  
118 in OA scores between SHAM-operated and non-operated knee joints (10,11). Animals were  
119 randomly allocated to experimental groups to reduce subjective bias. Following transection of  
120 the medial meniscotibial ligament (MMTL) to destabilise the medial meniscus, the skin was  
121 closed and anaesthesia reversed (10). Eight weeks later, mice were sacrificed by  
122 exsanguination and confirmation of death by cervical dislocation. The knee joints of all the  
123 mice were dissected, fixed in 4% paraformaldehyde for 24 hours at  $4^{\circ}\text{C}$ , and then stored in  
124 70% ethanol.

#### 125 *In vivo loading of the knee joint*

## Growth dynamics and osteoarthritis

126 The right knee joints of 16-week-old wild type C57BL/6 male mice ( $n = 4$ ) were subjected to  
127 non-invasive, dynamic axial mechanical loading under the isoflurane-induced anaesthesia  
128 (liquid isoflurane was vaporised to a concentration of 4% and maintained at a concentration  
129 of 2% with oxygen) for 7 min/day, 3 alternate days a week for 2 weeks according to the  
130 protocols described in the previous studies (12,13). The left knee joints were non-loaded  
131 internal controls in these animals. Briefly, using a servo-electric materials testing machine  
132 (Electroforce 3100, Bose, UK), axial compressive loads were applied through the right knee  
133 joint via customised concave cups which held the knee and ankle joints flexed and the tibiae  
134 vertically.

135 The tibia was held in place by continuous static preload of 0.5N onto which dynamic loads  
136 were superimposed in a series of 40 trapezoidal shaped waveform cycles with steep up and  
137 down ramps and a peak force of 11N for 0.05 seconds (0.025 seconds rise and fall time; 9.9  
138 seconds baseline hold time between periods of peak loading). The right and left knees were  
139 dissected 3 days after the final loading episode. Mice were sacrificed by exsanguination and  
140 confirmation of death by cervical dislocation. Knee joints were fixed in 4%  
141 paraformaldehyde for 24 hours at 4°C before being stored in 70% ethanol.

### 142 *Micro-computed (microCT) tomography and 3-dimensional (3D) bridging analysis*

143 Scans were performed with an 1172 X-Ray microtomograph (Bruker MicroCT, Kontich,  
144 Belgium) to evaluate the SCB and GP bridging. High-resolution scans with an isotropic voxel  
145 size of 5  $\mu\text{m}$  were acquired (50 kV, 200  $\mu\text{A}$ , 0.5 mm aluminium filter, 0.6° rotation angle).  
146 The projection images were reconstructed and binarised with a threshold of 0 to 0.16, ring  
147 artefact reduction was set at 10 and beam hardening correction at 0% using the SkyScan  
148 NRecon software package (v1.6.9.4, Bruker MicroCT). The images then were realigned  
149 vertically using DataViewer software (v1.5.1.2 64-bit, Bruker MicroCT) to ensure similar

## Growth dynamics and osteoarthritis

150 orientation for analysis. Hand-drawn regions of interests (ROI) of the SCB and epiphyseal  
151 trabecular bone for each tibial lateral and medial compartments were selected (14). The  
152 structural parameters of tibial SCB plate and epiphyseal trabecular bone were calculated  
153 using 3D algorithms of SkyScan CTAn software (Bruker MicroCT) including SCB (SCB  
154 BV/TV; %) and trabecular bone volume fraction (Tb. BV/TV; %) and correlated to GP  
155 bridging analysis using a 3D synchrotron-computed tomography quantification method as  
156 previously described (15). Briefly, microCT scans of the tibiae were segmented using a  
157 region-growing algorithm within the Avizo® (V8.0, VSG, Burlington, VT, USA) software.  
158 The central points of each bony bridges were identified and projected on the tibial joint  
159 surface. The distribution of the areal number density of bridges (N, the number of bridges per  
160  $256 \mu\text{m} \times 256 \mu\text{m}$  window;  $d = m/V$ ) is then calculated and superimposed on the tibial joint  
161 surface (each bridge has a colour that represents the areal number density at the bridge  
162 location). The SCB plate and epiphyseal trabecular bone thickness (Th; mm) was determined  
163 and colour-coded thickness images were generated using the Avizo® software (15).

### 164 *Histological analysis*

165 The left and right knee joints of all the mice were decalcified in 10%  
166 ethylenediaminetetraacetic acid (EDTA) solution, wax-embedded at Leica EG1160 Tissue  
167 Embedding Station and  $6 \mu\text{m}$  coronal sections cut using Leica RM2135 manual microtome.

### 168 *Immunohistochemistry*

169 Immunohistochemical analysis of chondrocyte transiency markers in tibial AC and GP was  
170 performed on  $6 \mu\text{m}$  coronal sections using anti-matrix metalloproteinase 13 (anti-MMP13)  
171 (1:200 dilution; Abcam) or anti-collagen type X (anti-Col10a1) (1:100 dilution; Abcam)  
172 antibodies. As a control, an equal concentration of rabbit IgG was used. For  
173 immunohistochemical localisation of MMP13 and Col10a1, sections were dewaxed in xylene  
174 and rehydrated. Sections were incubated at  $37^\circ\text{C}$  for 30 min in 1mg/ml trypsin for antigen

## Growth dynamics and osteoarthritis

175 demasking. Endogenous peroxidases were blocked by treatment with 0.3% H<sub>2</sub>O<sub>2</sub> in methanol  
176 (Sigma) for 30 min at room temperature. The Vectastain ABC universal detection kit (Vector  
177 Laboratories, Peterborough, UK) was used to detect the biotinylated secondary antibody  
178 (Anti-Mouse IgG Reagent) after incubation for 30 min at room temperature according to the  
179 manufacturer's instructions. Diaminobenzidine (DAB) solution used to detect the location of  
180 antigens. The sections were finally dehydrated, counterstained with haematoxylin and  
181 mounted in DePeX. All sections to be compared were immunolabelled at the same time to  
182 standardise conditions and minimise any differences in antibody incubation times.

### 183 *GP zone analysis*

184 The stained sections from the joints of 4 individual mice from each experimental group were  
185 used to measure the width of the GP proliferating and hypertrophic zones, as well as the total  
186 GP width, measured at 10 different points along the length of the GP in tibiae, using a light  
187 microscope and ImageJ software.

### 188 *Statistical analysis*

189 All analyses were performed with GraphPad Prism software 6.0f version (GraphPad Inc, La  
190 Jolla, CA, USA) using a two-sided 0.05 level of significance. The results were presented as  
191 the mean  $\pm$  standard error of the mean (SEM). The Normal distribution of data was assessed  
192 using the Shapiro-Wilk normality test. For comparing two groups (experimental with control,  
193 or medial with the lateral compartment of tibiae), two-tail Student's *t*-test (paired or unpaired)  
194 was used. For comparing more than two groups, two-way ANOVA (analysis of variance) was  
195 used with Tukey post-hoc test.

## 196 **Results**

197 *Transient chondrocyte behaviour in the tibial AC of DMM and loaded C57BL/6 young adult*  
198 *male mice*



## Growth dynamics and osteoarthritis

199 We first sought to confirm whether loss of AC in C57BL/6 mice with surgically and loading  
200 induced OA was associated with the expression of markers of transient chondrocyte  
201 phenotype. Immunohistochemistry analysis showed higher expression levels of well-  
202 established chondrocyte hypertrophy markers; Col10a1 and MMP13, observed in tibial AC of  
203 C57BL/6 mice that have undergone DMM surgery or mechanical loading compared with  
204 non-operated and non-loaded control left tibiae, respectively (Figure 1A, 1B). The expression  
205 pattern of Col10a1 was largely restricted to hypertrophic chondrocytes in the uncalcified zone  
206 of the AC of unaffected condyles of non-operated (Figure 1A) and non-loaded (Figure 1B)  
207 mouse left joints as expected (16). Whereas, the immunolabeling of Col10a1 was more  
208 widespread throughout the extracellular matrix (ECM) of the AC in affected right joints of  
209 DMM (Figure 1A) and loaded (Figure 1B) mice. Similarly, immunohistochemistry analysis  
210 showed positive MMP13 labelling in both superficial and deep articular chondrocytes in the  
211 right joints of DMM and loaded C57BL/6 male mice compared to the control knee joints  
212 (Figure 1A and B). These findings confirm an aberrant deployment of transient chondrocytes  
213 in uncalcified AC.

### 214 *Dysfunctional GP morphology in DMM and loaded tibiae of C57BL/6 young adult male mice*

215 In the tibial GP of mice with surgically and loading induced OA, Col10a1 expression was  
216 more greatly and widely dispersed throughout the zones of proliferative and hypertrophic  
217 chondrocytes compared with their controls (Figure 2A and 2B). Indeed, immunolabeling for  
218 Col10a1 revealed the expected localisation in the GP of non-operated and non-loaded mouse  
219 tibiae, limited primarily to the hypertrophic zone and underlying adjacent metaphyseal bone  
220 (Figure 2A and 2B). This disrupted the distribution of a GP zone marker was also evident for  
221 MMP13 in the GP of DMM and loaded C57BL/6 mouse tibiae compared to their controls  
222 (Figure 2A and 2B).

## Growth dynamics and osteoarthritis

223 GP zone analysis revealed significantly enlarged proliferative and hypertrophic zones of  
224 chondrocytes in both DMM ( $p<0.001$  and  $p<0.0001$ , respectively) and loaded (both  
225  $p<0.0001$ ) tibiae of C57BL/6 mice compared to their controls, and significantly increased  
226 total GP width (both  $p<0.0001$ ) (Figure 3). Together, the results may indicate associations  
227 between dysfunctional GP morphology and marker expression, and OA development.

228 *Associations between GP bridging in DMM and loaded tibiae of C57BL/6 young adult male*  
229 *mice and OA development*

230 To further correlate aberrant longitudinal GP dynamics, GP bridging and OA development in  
231 these C57BL/6 young adult male mice, we used our newly developed 3D method to quantify  
232 bony bridges across the tibial epiphysis of DMM and loaded mice (Figure 4). 3D  
233 quantification revealed a significantly higher number of GP bridges in medial compared to  
234 lateral tibiae that underwent DMM surgeries ( $306 \pm 32$  versus  $196 \pm 33$ ;  $p<0.05$ ) (Figure 4B  
235 and 4E). This significant difference was not observed in non-operated tibiae ( $326 \pm 32$  versus  
236  $254 \pm 32$ ;  $p>0.05$ ) (Figure 4A and 4E). Similarly, significantly enriched GP bridging was  
237 evident in the medial compartment of loaded tibiae in comparison to the lateral compartment  
238 ( $731 \pm 19$  versus  $532 \pm 56$ ;  $p<0.01$ ) (Figure 4D and 4E), and in those of non-loaded tibiae,  
239 although less pronounced than in the loaded right knee joints ( $782 \pm 38$  versus  $614 \pm 27$ ;  
240  $p<0.05$ ) (Figure 4C and 4E). However, no significant differences in GP bridge numbers and  
241 densities were observed between interventions (DMM versus non-operated, and loaded  
242 versus non-loaded) at this time point in either the medial or lateral compartment. Anatomical  
243 variations were observed however with clusters forming in the medial anterior of loaded  
244 tibiae versus those more in the central and posterior of non-loaded tibiae (Figure 4C and 4D).  
245 Similarly, in the DMM tibiae, GP bridges were more widespread across the tibiae than in  
246 non-operated which were predominantly observed around the periphery (Figure 4A and 4B).

## Growth dynamics and osteoarthritis

247 These results were consistent with the areal bridge density analysis. The mean areal bridge  
248 densities were significantly greater in medial compared to the lateral compartment of DMM  
249 ( $8.2 \pm 0.9$  versus  $10.3 \pm 0.9$ ;  $p < 0.01$ ) and loaded tibiae ( $16 \pm 0.9$  versus  $20.3 \pm 0.6$ ;  $p < 0.001$ )  
250 (Figure 4F). However, no significant differences in the mean areal bridge densities were  
251 observed between interventions (DMM versus non-operated, and loaded versus non-loaded).

### 252 *MicroCT analysis and 3D visualisation of SCB plate and epiphyseal trabecular bone*

253 To establish whether aberrant GP dynamics are associated with the SCB plate and epiphyseal  
254 trabecular bone abnormalities after the DMM surgery and mechanical loading in our mice,  
255 we performed microCT analysis and determined local thickness of SCB plate and epiphyseal  
256 trabecular bone. The SCB plate volume fraction (SCB BV/TV) was significantly higher in  
257 medial compared to lateral compartment of DMM and non-operated tibiae (DMM: SCB  
258 BV/TV DMM:  $29.42 \pm 3.1\%$  versus  $36.72 \pm 4.5\%$ ,  $p < 0.05$ , non-operated:  $35.67 \pm 0.7\%$   
259 versus  $42.57 \pm 1.54\%$ ,  $p < 0.01$ ) (Figure 5A). No significant differences were observed  
260 between DMM and non-operated tibia (Figure 5A), or in the epiphyseal trabecular bone  
261 volume fraction (Tb. BV/TV; Figure 5B). Conversely, in the loaded and non-loaded tibiae,  
262 epiphyseal trabecular bone volume fraction (Tb. BV/TV) was significantly increased in the  
263 medial compared to lateral compartment (loaded: Tb. BV/TV  $63.13 \pm 1.2\%$  versus  $76.61 \pm$   
264  $2.7\%$ ,  $p < 0.01$ , non-loaded: Tb. BV/TV  $64.58 \pm 1.4\%$  versus  $79.1 \pm 3.2\%$ ,  $p < 0.01$ ) (Figure  
265 5D). No significant differences were observed between interventions, or in the SCB BV/TV  
266 (Figure 5C). Colour-coded SCB plate thickness analysis revealed anatomical variation in  
267 SCB plate thickness between DMM and non-operated, and loaded and non-loaded plates  
268 (Figure 6A and 6B). Differences in the non-loaded and loaded SCB plates were particularly  
269 apparent (Figure 6B), and correlated with the clusters of higher density GP bridges previously  
270 observed (Figure 4C and 4D). Epiphyseal trabecular bone thickness was not significantly

## Growth dynamics and osteoarthritis

271 altered in response to either invasive or non-invasive intervention (data not shown; Figure 6C  
272 and 6D).

### 273 **Discussion**

274 This study reveals altered GP dynamics in both surgical (DMM) and non-invasive loading  
275 murine *in vivo* models of OA, which with findings described above may indicate an  
276 endochondral defect in AC and GP cartilage in these mouse models of OA. Our data show  
277 changes in AC of the knee joints of these mice consistent with the aberrant deployment of  
278 hypertrophic chondrocytes. This is associated with disrupted GP morphology, increased GP  
279 chondrocyte differentiation indicated by widespread expression of chondrocyte hypertrophy  
280 markers and increased GP zone widths. Moreover, we have discovered enriched GP bony  
281 bridging indicative of premature GP fusion and accelerated growth cessation in the medial  
282 compartment of tibiae of these mice. These bridging events are spatially correlated with  
283 increases in SCB thickness. These data reveal that altered GP dynamics and spatial  
284 differences in GP bridging may contribute to an anatomical variation in vulnerability to OA  
285 development in surgical and loaded murine models of OA.

286 The STR/ort OA murine model is predisposed to developing spontaneous idiopathic OA  
287 whilst its nearest available parental strain, the CBA mouse, has a very low susceptibility  
288 which makes them effective controls for the studies (17). We have previously shown that  
289 aberrant deployment of transient chondrocyte behaviour, consistent with re-initiation of  
290 endochondral processes, occurs in uncalcified AC of STR/ort mouse knee joints compared to  
291 CBA controls (8). Here we extend these studies to look at the expression of transient markers  
292 in other stratifications of OA. Surgically induced DMM model is widely used for target  
293 validation studies or evaluation of the pathophysiological roles of many molecules in OA.  
294 Following DMM, medial displacement of the medial meniscus in a mouse knee joint provides

## Growth dynamics and osteoarthritis

295 a smaller area to transmit the weight-bearing forces and leads to an increased local  
296 mechanical stress (18). Whereas, in a cyclic AC tibial compression model, the non-invasive  
297 dynamic mechanical loading applied to the mouse tibia through the knee and ankle joints,  
298 modifies AC structure locally through a mechanoadaptive homeostatic response contributing  
299 to OA development (19). Our findings in both surgical and non-invasive loading C57BL/6  
300 mouse models are consistent with the evidence of the role of chondrocyte phenotype  
301 alterations in OA pathology. Hypertrophic chondrocytes in the calcified cartilage and GP of  
302 the healthy joints express Col10a1 (17–19). The calcified cartilage acts to protect the  
303 uncalcified AC through maintaining its ECM in an unmineralised state and the stability of the  
304 AC. However, hypertrophic differentiation of these chondrocytes contributes to AC matrix  
305 degradation, calcification and vascular invasion resulting in the demise of the AC (23).  
306 Consistent with this, the expression of Col10a1, as examined using immunohistochemistry,  
307 has been observed throughout AC in the joints of our both DMM and loaded mice. Further,  
308 the higher expression level of another marker of chondrocyte hypertrophy; MMP13 has been  
309 detected in superficial and uncalcified chondrocytes in the AC of DMM and loaded mice  
310 compared to their non-operated and non-loaded left knee joints. Indeed, cartilage degradation  
311 observed in OA has been attributed to an elevated production of proteolytic enzymes among  
312 which MMP13 has a major role (24,25). Studies using transgenic mice deficient in catabolic  
313 transcription factors that induce hypertrophic differentiation revealed that animals were  
314 protected against surgically and chemically induced OA further highlighting the role of  
315 transient chondrocytes in AC degradation (26,27).

316 The results of the present study indicate aberrant widespread expression of Col10a1 and  
317 MMP13 in the GP of DMM and loaded tibiae of C56BL/6 mice, compared to the GP of non-  
318 operated and non-loaded control knees. Indeed, the histomorphometric analysis also revealed  
319 that these mice display a significantly enlarged zone of proliferative and hypertrophic

## Growth dynamics and osteoarthritis

320 chondrocytes, compared with the chondrocytes in the GP of control tibiae of both models.  
321 Similarly, a significantly increased cumulative GP width was observed in these models.  
322 Longitudinal bone growth is determined by the modifying number of chondrocytes in the  
323 proliferative zone of GP, rate of their proliferation, the extent of chondrocyte hypertrophy  
324 and controlled synthesis and degradation of ECM throughout the GP (28). Altered growth  
325 rate and mechanical modulation of GP function appear to result from complex interactions of  
326 changes in the states of these chondrocytes, as does the rate of growth plate closure due to the  
327 formation of bone bridges forming and spanning the width of the GP.

328 Our report of increased GP chondrocyte dynamics in these DMM and loaded C57BL/6 mice  
329 is further strengthened by our data acquired using a 3D quantification method of bony  
330 bridging across the tibial epiphysis, which showed premature GP closure in the medial  
331 compartment of the tibiae in all mice examined, regardless of intervention. This was  
332 indicated by significantly enriched spatial localisation of GP bone bridging clustering and  
333 number in the medial compared to the lateral compartments of DMM mice compared to non-  
334 operated mice. This is consistent with our previous work in the STR/Ort mouse model of  
335 spontaneous OA in which we observed similar spatial variations. We postulate that the  
336 formation of these bridges may be accelerated by local factors like instigating altered  
337 mechanoadaptive response and that these spatial variations in GP bridging may disclose the  
338 anatomical vulnerability to OA. These findings are supported by the previous studies  
339 suggesting associations between local mechanical stress caused by medial displacement of  
340 the medial meniscus (29) or cyclic tibial AC compression (19) and GP function in C57BL/6  
341 mice. They are further supported by our previous work in which we revealed, by finite  
342 element modelling, that GP bridges act to dissipate stresses upon loading to the overlying  
343 SCB and thus suggest that this contributes to OA seen in these models. These studies have,  
344 for the first time, shown that accelerated GP closure is indicative of modified growth

## Growth dynamics and osteoarthritis

345 dynamics in the right tibiae of both surgical and loading murine models of OA. This is  
346 consistent with our microCT analysis of spatial variations in SCB plate thickening in these  
347 animals, and its correlation to GP bridges. We observed statistically significant changes in  
348 subchondral bone parameters in medial compared to lateral compartment including  
349 subchondral bone volume fraction in the tibiae of DMM mice and epiphyseal trabecular bone  
350 volume fraction in the tibiae of loaded mice. It was previously shown that SCB thickening  
351 may be intensified by adjacent AC lesions following mechanical trauma thus indicating a  
352 special link between changes in SCB architecture and AC lesions in OA pathology (14).

353 However, the limitation of this study is that we only examined the GP at one specific time  
354 point for each model and therefore more time points are required to understand how these GP  
355 bridges temporally affect SCB changes and OA pathology. With its controllability, the  
356 intermittent non-invasive mechanical loading model will allow in future to distinguish  
357 between short- and long-term effects of various cyclic loading regimens on subchondral and  
358 trabecular bone parameters as well as AC integrity, GP dynamics and correlate these to  
359 initiation and progression of human OA. Indeed, it is known that in the loading model, the  
360 short-term intervention is not sufficient to induce changes in subchondral thickness and thus  
361 longer intervention times for both the DMM and loading models may also prove useful in  
362 pursuit of understanding these relationships (14).

363 Taken together, our studies indicate that accelerated GP chondrocyte dynamics and bridging  
364 events may contribute to OA pathology in both surgical and loading C57BL/6 mouse OA  
365 models and that similar osteoarthritic pathological changes happen in different *in vivo* models  
366 of secondary (post-traumatic) OA (18) through inducing direct (DMM) or indirect  
367 (mechanical loading) injuries to the joints. The GP bony bridging analysis may signify  
368 accelerated cartilage-bone transition and growth cessation in these affected bones advancing  
369 our understanding of GP closure mechanisms and how these contribute to the health of the

## Growth dynamics and osteoarthritis

370 joint. Further, our work yields more insights into the changes in the micro-mechanical  
371 environment of the GP and cells, specifically chondrocytes, within the GP.

372 Nonetheless, whether modified GP trajectories are prevalent in human OA is yet to be  
373 defined and studies determining associations between GP dynamics during adolescence and  
374 OA development in human patients would allow elucidation of the pathogenesis of OA and  
375 will ultimately enable the development of novel and specific therapeutic interventions.

### 376 **Acknowledgements**

377 The authors would like to thank The Roslin Institute of The University of Edinburgh for the  
378 assistance with the care of animal models in this study.

### 379 **Author contributions**

380 All authors contributed to the study design, analysis and interpretation of the data, drafted,  
381 critically reviewed, edited and approved the version of the manuscript for publication.

### 382 **References**

383 1. Murray CJ., Lopez AD. Global Burden of Disease and Injur Y Series the Global Burden of  
384 Disease. *Oms* 1996:1–46.

385 2. Goldring MB, Goldring SR. Osteoarthritis. *J Cell Physiol* 2007;213:626–634.

386 3. Altman R, Asch E, Bloch D, Bole G, Borenstein D, Brandt K, et al. Development of  
387 criteria for the classification and reporting of osteoarthritis: Classification of osteoarthritis of  
388 the knee. *Arthritis Rheum* 1986;29:1039–1049.

389 4. Pacifici M, Koyama E, Shibukawa Y, Wu C, Tamamura Y, Enomoto-Iwamoto M, et al.  
390 Cellular and molecular mechanisms of synovial joint and articular cartilage formation. *Ann N*  
391 *Y Acad Sci* 2006;1068:74–86.



## Growth dynamics and osteoarthritis

- 392 5. Staines KA, MacRae VE, Farquharson C. The importance of the SIBLING family of  
393 proteins on skeletal mineralisation and bone remodelling. *J Endocrinol* 2012;214:241–255.
- 394 6. Parfitt AM. Misconceptions (1): Epiphyseal fusion causes cessation of growth. *Bone*  
395 2002;30:337–339.
- 396 7. Glatt V, Canalis E, Stadmeier L, Bouxsein ML. Age-related changes in trabecular  
397 architecture differ in female and male C57BL/6J mice. *J Bone Miner Res* 2007;22:1197–  
398 1207.
- 399 8. Staines KA, Madi K, Mirczuk SM, Parker S, Burleigh A, Poulet B, et al. Endochondral  
400 Growth Defect and Deployment of Transient Chondrocyte Behaviors Underlie Osteoarthritis  
401 Onset in a Natural Murine Model. *Arthritis Rheumatol* 2016;68:880–891.
- 402 9. Madi K, Staines KA, Bay BK, Javaheri B, Geng H, Bodey AJ, et al. In situ  
403 characterization of nanoscale strains in loaded whole joints via synchrotron X-ray  
404 tomography. *Nat Biomed Eng* 2019;4:343–354.
- 405 10. Glasson BVSc SS, Blanchet BS TJ, Morris DVM EA. The surgical destabilization of the  
406 medial meniscus (DMM) model of osteoarthritis in the 129/SvEv mouse. *Osteoarthr Cart*  
407 2007;15:1061–1069.
- 408 11. Staines KA, Ikpegbu E, Törnqvist AE, Dillon S, Javaheri B, Amin AK, et al. Conditional  
409 deletion of E11/podoplanin in bone protects against load-induced osteoarthritis. *BMC*  
410 *Musculoskelet Disord* 2019;20:1–11.
- 411 12. Sugiyama T, Price JS, Lanyon LE. Functional adaptation to mechanical loading in both  
412 cortical and cancellous bone is controlled locally and is confined to the loaded bones. *Bone*  
413 2010;46:314–321.

## Growth dynamics and osteoarthritis

- 414 13. Poulet B, Hamilton RW, Shefelbine S, Pitsillides AA. Characterizing a novel and  
415 adjustable noninvasive murine joint loading model. *Arthritis Rheum* 2011;63:137–147.
- 416 14. Poulet B, Souza R de, Kent A V, Saxon L, Barker O, Wilson A, et al. Intermittent applied  
417 mechanical loading induces subchondral bone thickening that may be intensified locally by  
418 contiguous articular cartilage lesions. *Osteoarthr Cartil* 2015;23:940–8.
- 419 15. Staines KA, Madi K, Javaheri B, Lee PD, Pitsillides AA. A computed microtomography  
420 method for understanding epiphyseal growth plate fusion. *Front Mater* 2018;4.
- 421 16. Chambers MG, Kuffner T, Cowan SK, Cheah KSE, Mason RM. Expression of collagen  
422 and aggrecan genes in normal and osteoarthritic murine knee joints. *Osteoarthr Cartil*  
423 2002;10:51–61.
- 424 17. Poulet B, Westerhof TAT, Hamilton RW, Shefelbine SJ, Pitsillides AA. Spontaneous  
425 osteoarthritis in Str/ort mice is unlikely due to greater vulnerability to mechanical trauma.  
426 *Osteoarthr Cartil* 2013;21:756–763.
- 427 18. Samvelyan HJ, Hughes D, Stevens C, Staines KA. Models of Osteoarthritis: Relevance  
428 and New Insights. *Calcif Tissue Int* 2020. Available at: [https://doi.org/10.1007/s00223-020-](https://doi.org/10.1007/s00223-020-00670-x)  
429 00670-x.
- 430 19. Poulet B, Hamilton RW, Shefelbine S, Pitsillides AA. Characterizing a novel and  
431 adjustable noninvasive murine joint loading model. *Arthritis Rheum* 2011;63:137–147.
- 432 20. Atkins GJ, Rowe PS, Lim HP, Welldon KJ, Ormsby R, Wijenayaka AR, et al. Sclerostin  
433 is a locally acting regulator of late-osteoblast/preosteocyte differentiation and regulates  
434 mineralization through a MEPE-ASARM-dependent mechanism. *J Bone Miner Res*  
435 2011;26:1425–1436.

## Growth dynamics and osteoarthritis

- 436 21. Lai Y, Bai X, Zhao Y, Tian Q, Liu B, Lin EA, et al. ADAMTS-7 forms a positive  
437 feedback loop with TNF- $\alpha$  in the pathogenesis of osteoarthritis. *Ann Rheum Dis*  
438 2014;73:1575–1584.
- 439 22. Lu Y, Ding M, Li N, Wang Q, Li J, Li X, et al. Col10a1-runx2 transgenic mice with  
440 delayed chondrocyte maturation are less susceptible to developing osteoarthritis. *Am J Transl*  
441 *Res* 2014;6:736–745.
- 442 23. Ea HK, Nguyen C, Bazin D, Bianchi A, Guicheux J, Reboul P, et al. Articular cartilage  
443 calcification in osteoarthritis: Insights into crystal-induced stress. *Arthritis Rheum*  
444 2011;63:10–18.
- 445 24. Ortega N, Behonick DJ, Werb Z. Matrix remodeling during endochondral ossification.  
446 *Trends Cell Biol* 2004;14:86–93.
- 447 25. Stickens D, Behonick DJ, Ortega N, Heyer B, Hartenstein B, Yu Y, et al. Altered  
448 endochondral bone development in matrix metalloproteinase 13-deficient mice. *Development*  
449 2004;131:5883–5895.
- 450 26. Saito T, Fukai A, Mabuchi A, Ikeda T, Yano F, Ohba S, et al. Transcriptional regulation  
451 of endochondral ossification by HIF-2 $\alpha$  during skeletal growth and osteoarthritis  
452 development. *Nat Med* 2010;16:678–686.
- 453 27. Yang S, Kim J, Ryu JH, Oh H, Chun CH, Kim BJ, et al. Hypoxia-inducible factor-2 $\alpha$  is a  
454 catabolic regulator of osteoarthritic cartilage destruction. *Nat Med* 2010;16:687–693.
- 455 28. Breur GJ, Lapierre MD, Kazmierczak K, Stechuchak KM, McCabe GP. The domain of  
456 hypertrophic chondrocytes in growth plates growing at different rates. *Calcif Tissue Int*  
457 1997;61:418–425.

## Growth dynamics and osteoarthritis

458 29. Huang H, Skelly JD, Ayers DC, Song J. Age-dependent Changes in the Articular  
459 Cartilage and Subchondral Bone of C57BL/6 Mice after Surgical Destabilization of Medial  
460 Meniscus. *Sci Rep* 2017;7:1–9. Available at: <http://dx.doi.org/10.1038/srep42294>.

### 461 **Figure legends**

462 **Figure 1A, 1B.** Immunohistochemical labelling for type X collagen (Col10a1) and matrix  
463 metalloproteinase (MMP13) in the articular cartilage of non-operated and DMM (A), or non-  
464 loaded and mechanically loaded (B) knee joints of C57BL/6 male mice. Arrows indicate  
465 examples of positive staining in the tibiae. Images are representative of results in 3 individual  
466 mice. Scale bar = 200µm

467 **Figure 2A, 2B.** Immunohistochemical labelling for type X collagen (Col10a1) and matrix  
468 metalloproteinase (MMP13) in the growth plate of DMM and non-operated (A), or  
469 mechanically loaded and non-loaded (B) knee joints of C57BL/6 male mice. Arrows indicate  
470 examples of positive staining in the tibiae. Images are representative of results in 3 individual  
471 mice. Scale bar = 200µm. PZ = proliferative zone; HZ = hypertrophic zone.

472 **Figure 3.** Growth plate zone width of non-operated and DMM, or non-loaded and loaded  
473 knee joints of C57BL/6 male mice. Ten measurements per section were obtained along the  
474 length of the growth plate of the tibiae (n=4 mice for each experimental group). PZ =  
475 proliferative zone; HZ = hypertrophic zone \*\*\*\*  $p < 0.0001$

476 **Figure 4A, 4B, 4C, 4D, 4E, 4F.** Location and areal densities of bridges across the growth  
477 plate projected on the medial (M) and lateral (L) tibial joint surface in non-operated (A),  
478 DMM (B), non-loaded (C) and loaded (D) tibiae of mice at 16 and 18 weeks of age, number  
479 of bridges in lateral and medial tibiae of non-operated compared to DMM and non-loaded  
480 compared to loaded tibiae of mice (E), Areal density (d) of bridges in medial compared to

## Growth dynamics and osteoarthritis

481 lateral tibiae, defined as the number of bridges per 256 mm x 256 mm window of non-  
482 operated and DMM or non-loaded and loaded knee joints (F). Bars represent mean  $\pm$  SEM.  
483 Group sizes were  $n = 8$  for non-operated and DMM-operated mice and  $n = 4$  for non-loaded  
484 and loaded mice. \*  $p < 0.05$  \*\*  $p < 0.01$  \*\*\*  $p < 0.001$

485 **Figure 5A, 5B, 5C, 5D.** MicroCT analysis of the epiphyseal region of the lateral and medial  
486 tibiae in non-operated controls and DMM-operated knee joints subchondral bone volume  
487 fraction (SCB BV/TV) (A) and epiphyseal trabecular bone volume fraction (Tb. BV/TV) (B).  
488 MicroCT analysis of the epiphyseal region of the medial and lateral tibiae in non-loaded  
489 controls and loaded knee joints subchondral bone volume fraction (SCB BV/TV) (C) and  
490 epiphyseal trabecular bone volume fraction (Tb. BV/TV) (D). Bars represent mean  $\pm$  SEM.  
491 Group sizes were  $n = 8$  for non-operated and DMM-operated mice and  $n = 4$  for non-loaded  
492 and loaded mice. \*  $p < 0.05$  \*\*  $p < 0.01$

493 **Figure 6A, 6B, 6C, 6D.** Representative colour coded images of lateral and medial  
494 subchondral bone plate thickness of non-operated and DMM-operated tibiae of mice (A).  
495 Representative colour coded images of lateral and medial subchondral bone plate thickness of  
496 non-loaded and loaded tibiae of mice (B). Representative colour coded images of epiphyseal  
497 trabecular bone thickness of non-operated and DMM-operated (C), or non-loaded and loaded  
498 tibiae of mice (D).

**A**

Non-operated

DMM

Col10a1

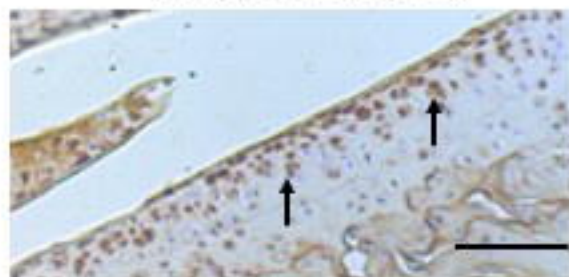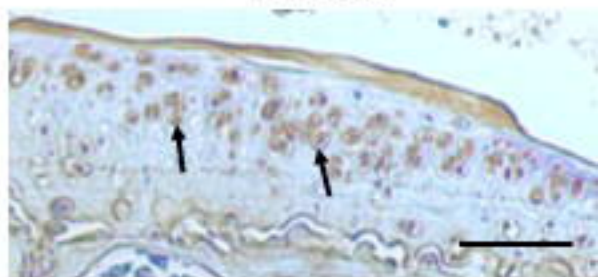

MMP13

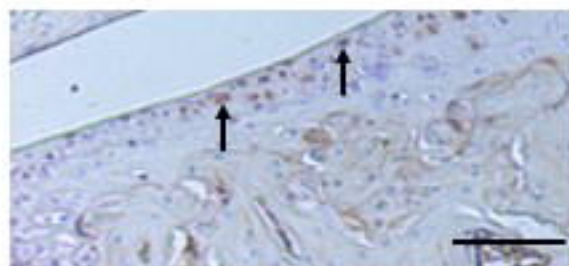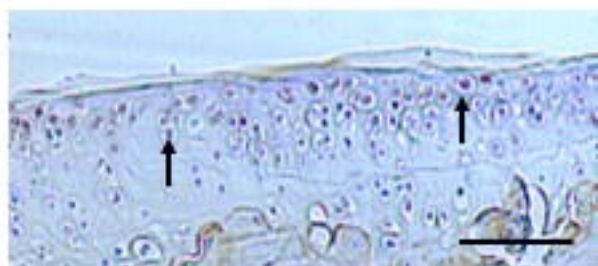**B**

Non-loaded

Loaded

Col10a1

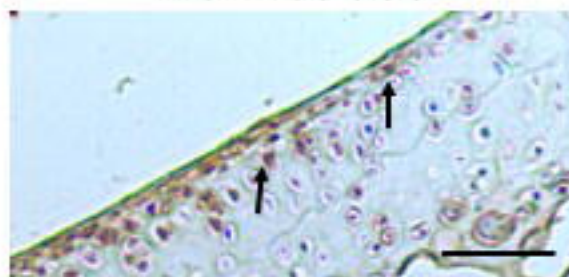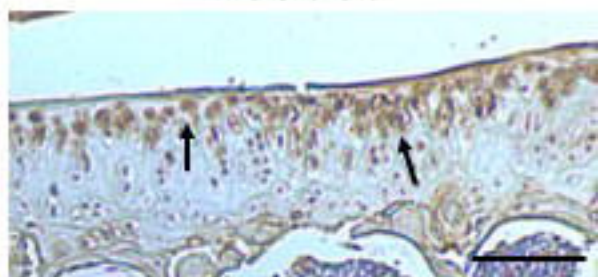

MMP13

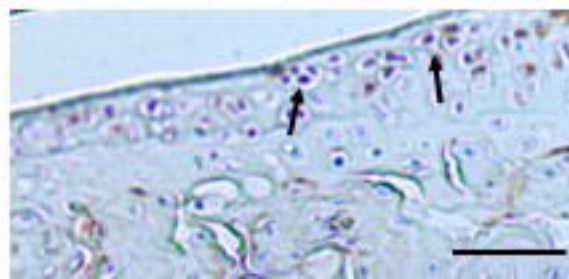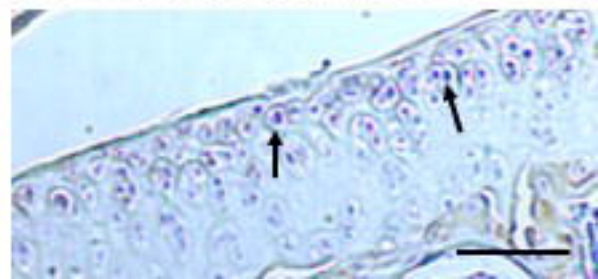



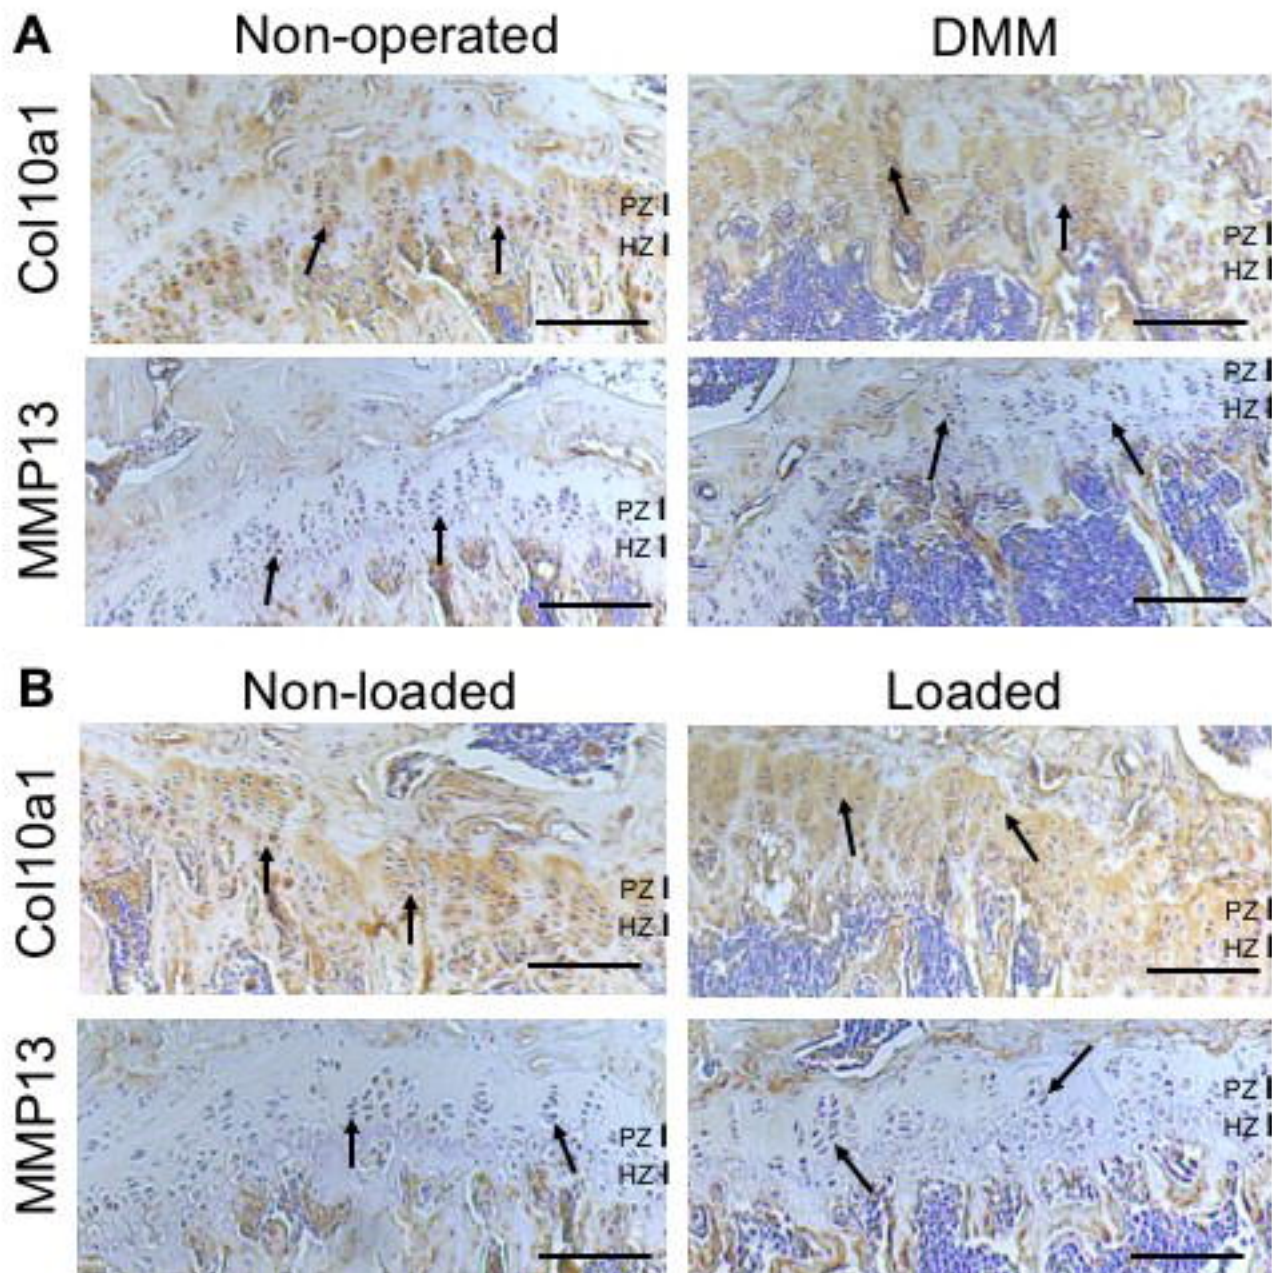

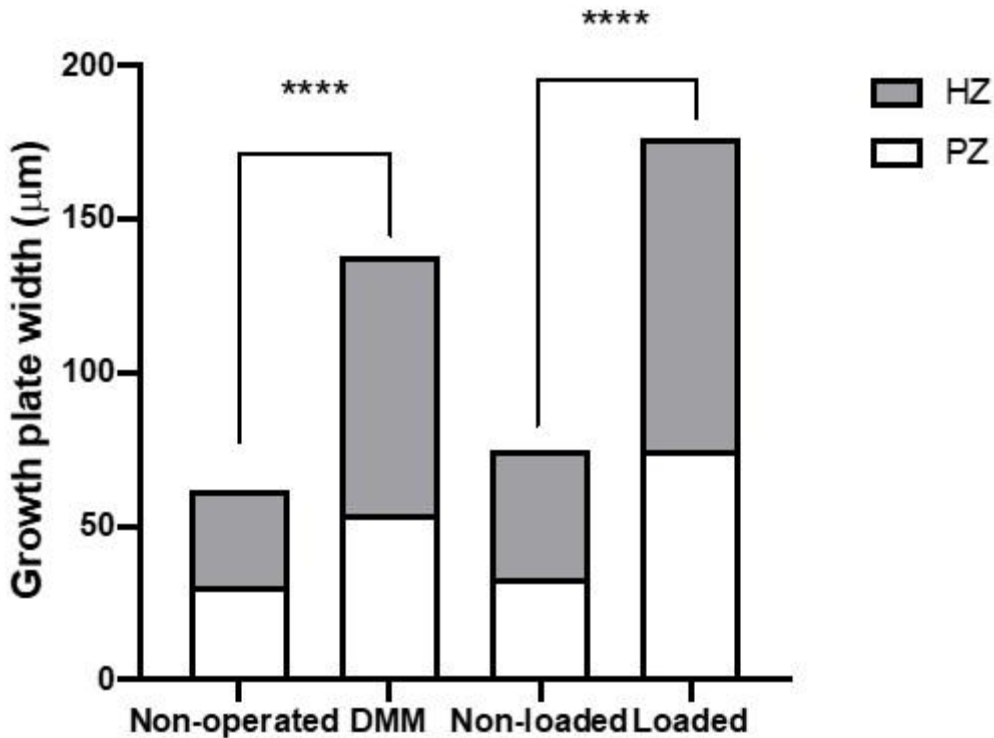



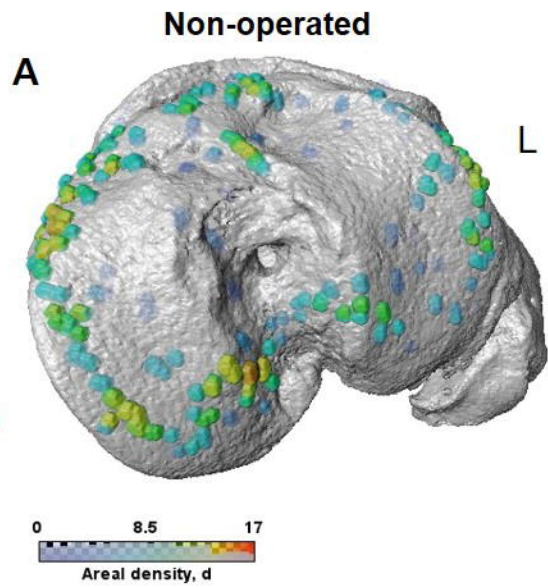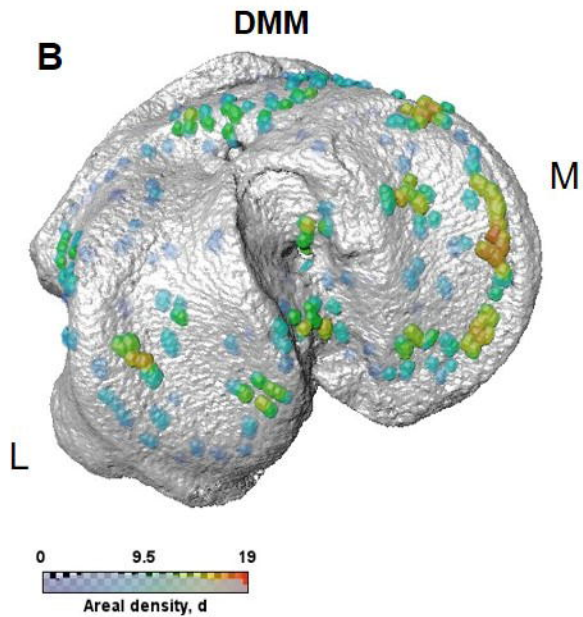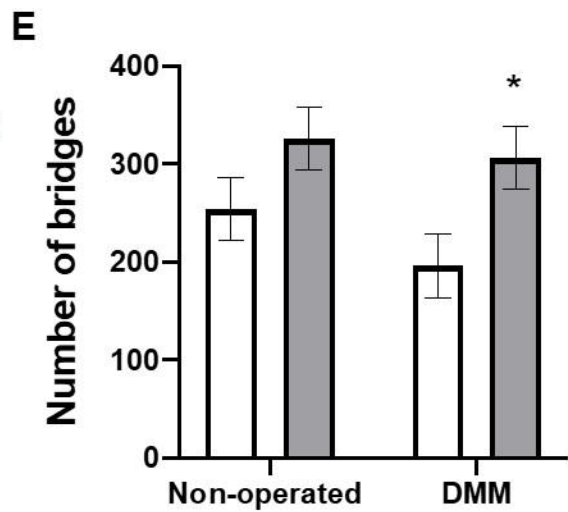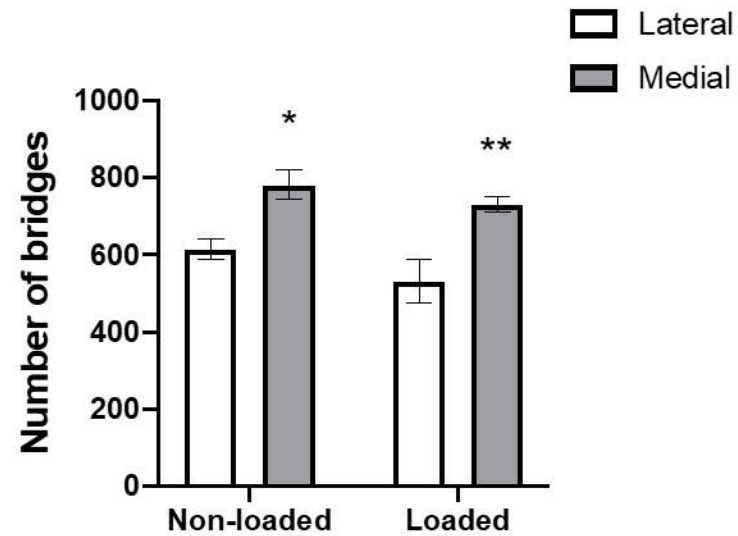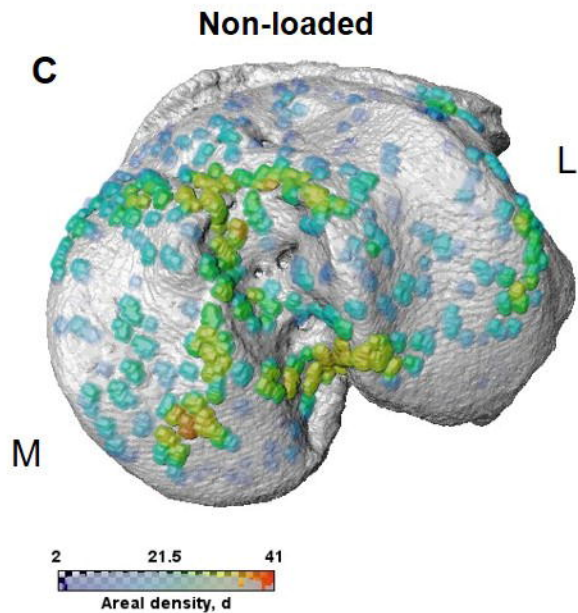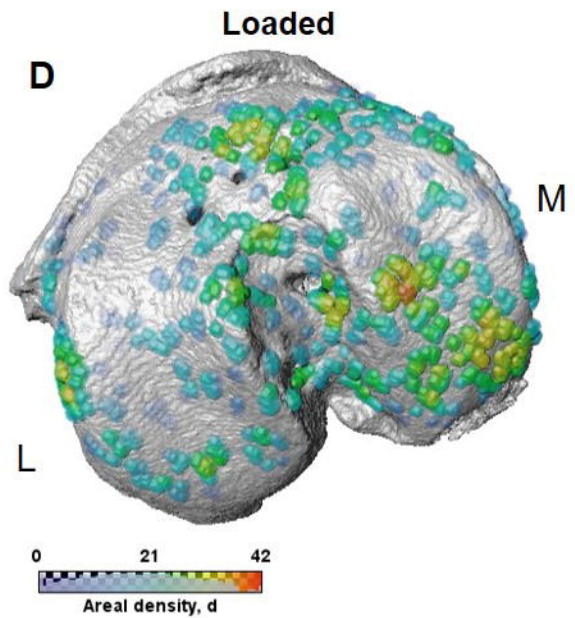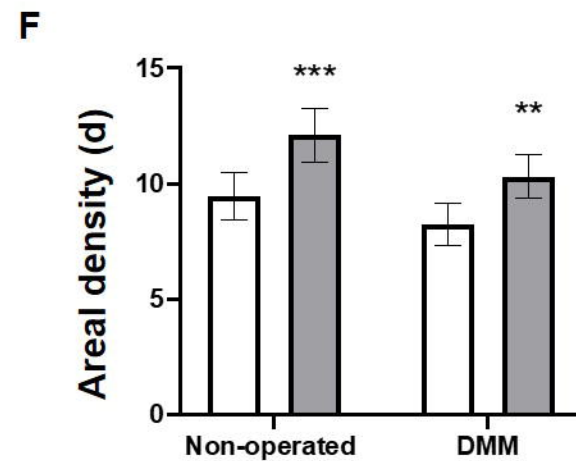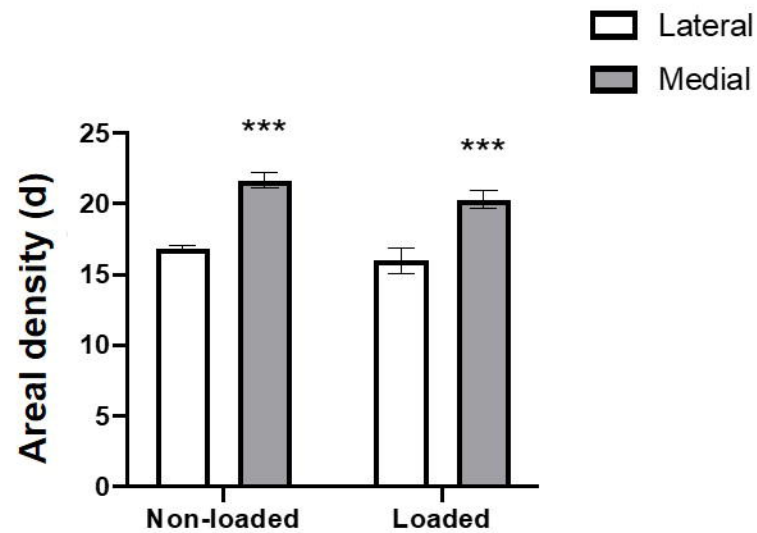

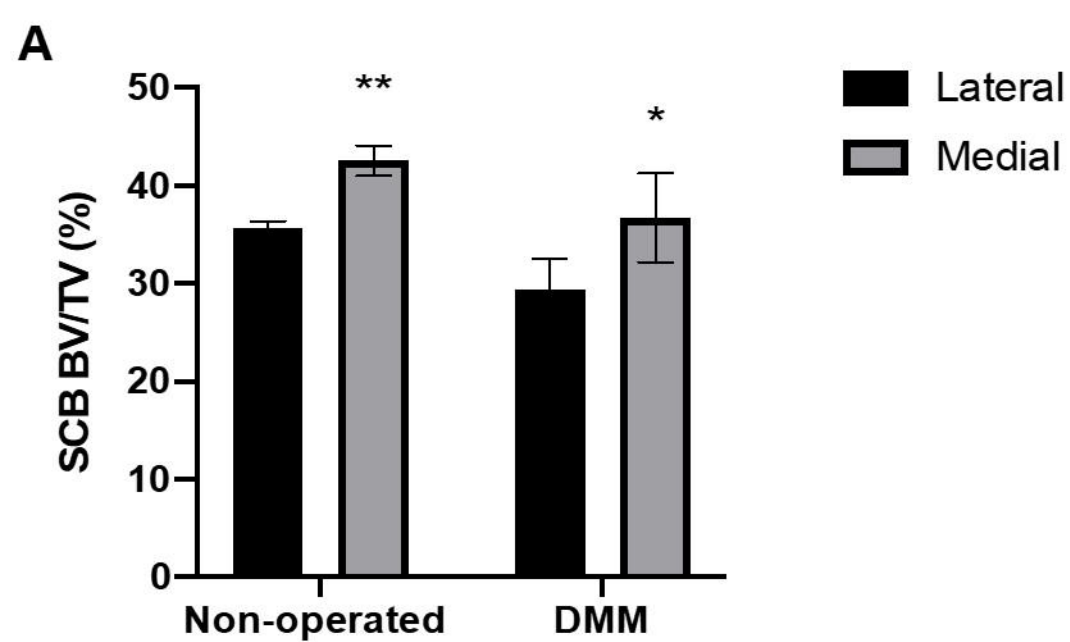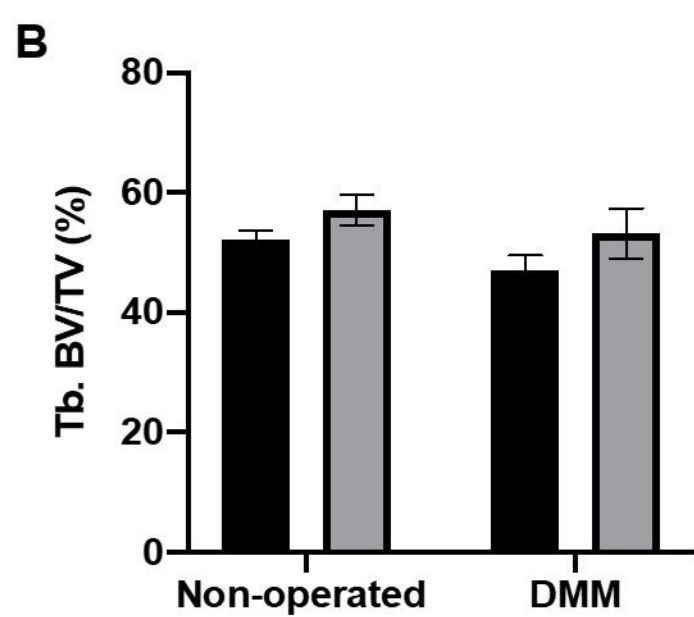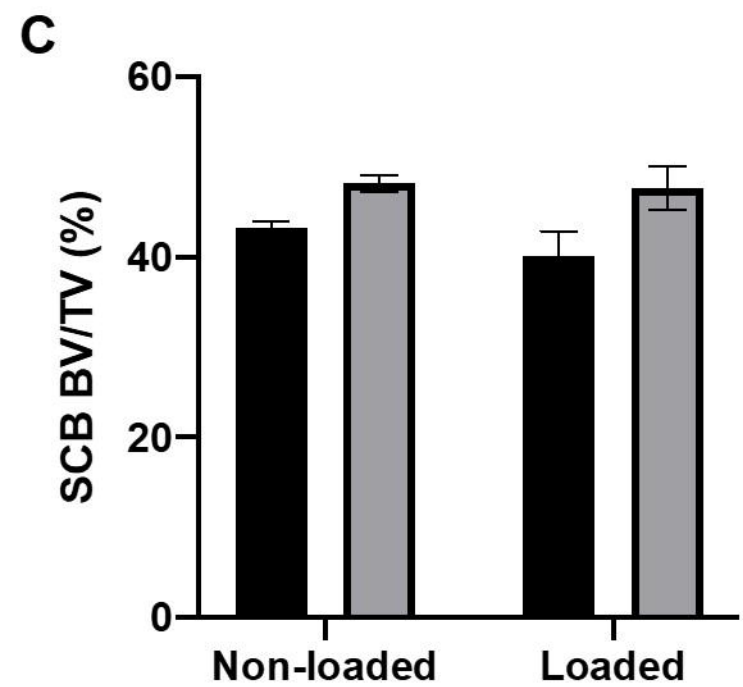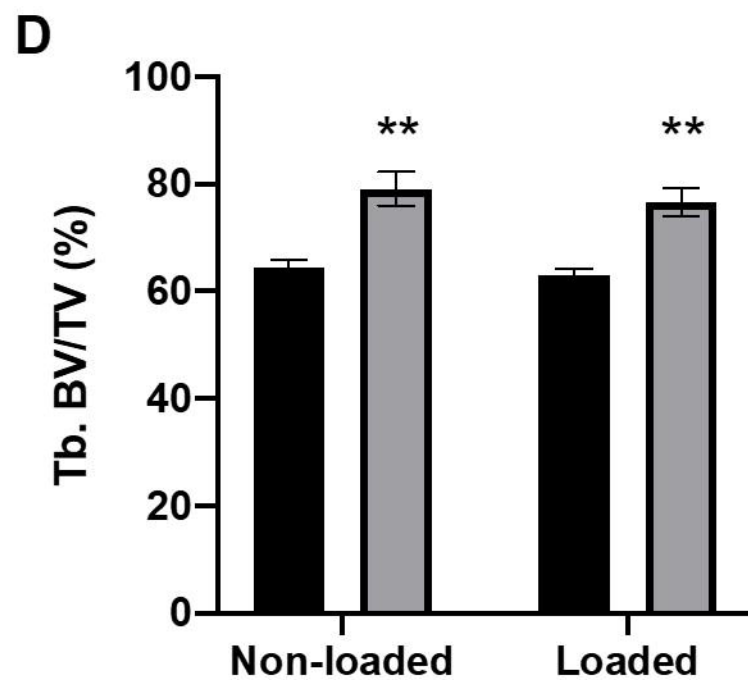



**A**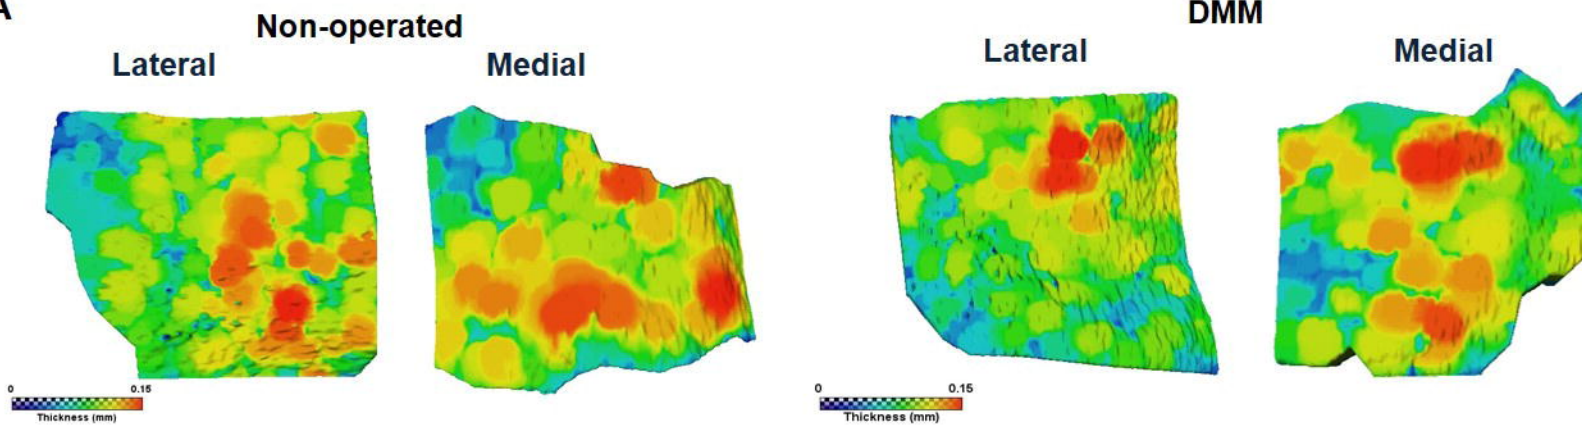**C**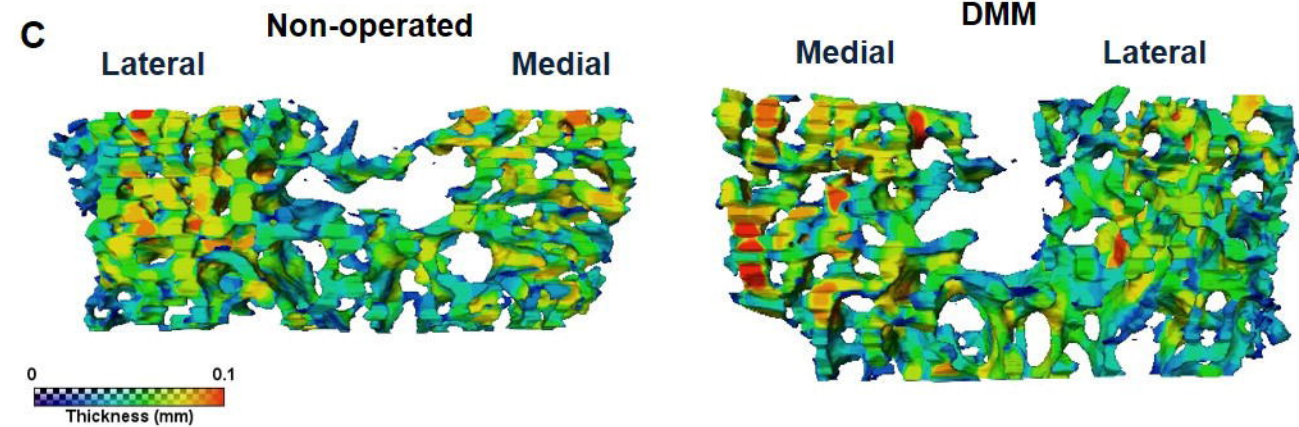**B**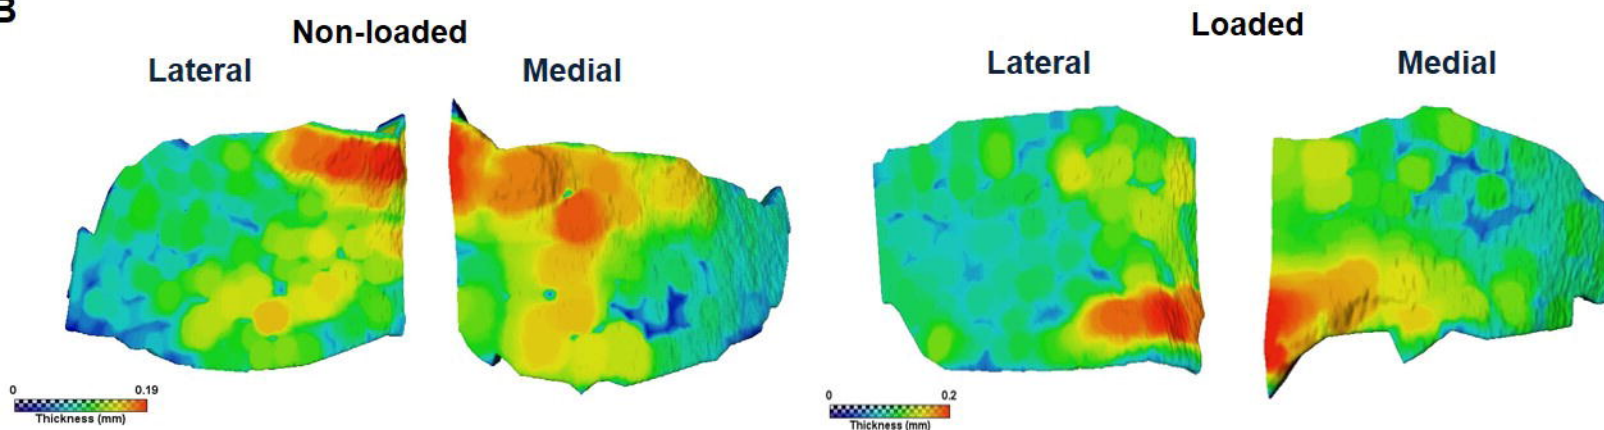**D**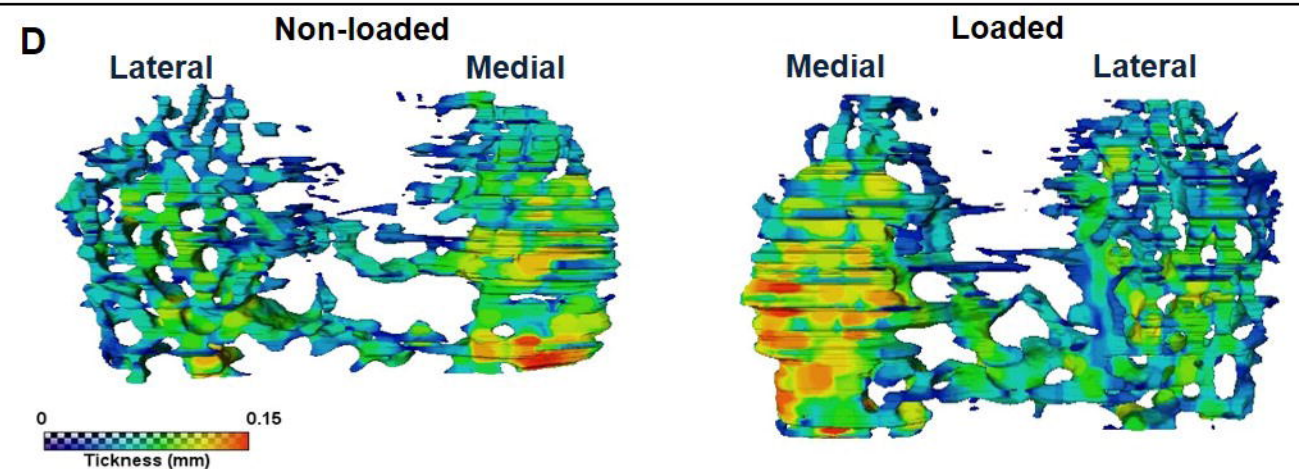

Source: http://biorxiv.org/content/10.1101/2020.10.14.339119v1.full.pdf
